# Supplementary material for: NIR light-triggered bursting of double-emulsion drops (DEDs) for microdroplet generation
Source: Royal Society of Chemistry journal article supplement (doi:10.1039/d4ay01194e), 2024-01-01
Supplement: d4ay01194e1.pdf [file d4ay01194e1.pdf]

## Electronic Supplementary Information (ESI)

### **NIR light-triggered bursting of double-emulsion drop (DED) for micro-droplets generation**

Zhaoze Lu<sup>a</sup>, Jian Yu<sup>a</sup>, Kaihua Wang<sup>a</sup>, Wei Cheng<sup>b</sup> and Likai Hou<sup>a\*</sup>

*a. Zhejiang Provincial Key Laboratory of Flow Measurement Technology, College of Metrology Measurement and Instrument, China Jiliang University, Hangzhou 310018, China*

*b. Key Laboratory of Measuring & Online Assessment of Energy for Jiangsu Province Market Regulation, Suzhou Institute of Metrology, Suzhou, 215128, China*

*\* E-mail: houlikai@cjlu.edu.cn*

This material gives supporting information of experimental videos for the bursting process of Double-emulsion drop (DED) studied in the paper.

#### *Supplementary Material Contents:*

Movie S1 The expansion and bursting process of a DED triggered by NIR light.

Movie S2 The bursting process of a DED with diameter of H<sub>2</sub>O of 5 μm.

Movie S3 The bursting process of a DED with high viscosity oil phase. (O<sub>2</sub>)

Movie S4 The bursting process of a DED with high viscosity oil phase. (O<sub>3</sub>)

Movie S5. The bursting process of a DED with camellia oil as its oil phase.
